# Supplementary material
Source: PubMed Central journal article supplement (PMC6765255)
Supplement: pnas.1907631116.sapp.pdf [file pnas.1907631116.sapp.pdf]

1 **Supplementary Information.**

2 **Text S1**

3 **Reversible drug resistance in *Mycobacterium bovis* BCG.** Previously, we had selected  
4 BCG mutants resistant to pyrazinoic acid (POA)(1). Mutants with high level POA resistance  
5 ( $MIC_{50} \geq 496 \mu\text{g/ml}$ ) had missense mutations in the presumed molecular target of POA, the  
6 coenzyme A biosynthetic gene *panD*, encoding aspartate decarboxylase. However, we also  
7 identified POA-resistant mutants with lower MICs ( $MIC_{50} = 248 \mu\text{g/ml}$ ). Among these were  
8 strains that produced smaller colonies (BCG POA4) than the wild-type strain on media  
9 containing glycerol (Fig. S3A). These SCs were found to have a C (frameshift) insertion in the  
10 10C homopolymeric tract (*M. bovis glpK*, nucleotide 566 to 575) of *glpK* (BCG\_3755c) (Fig.  
11 S3B), compared to the BCG Pasteur 1173P2 reference sequence (GenBank ID: NC\_008769.1).  
12 As in the spontaneous *glpK* frameshift in *M. tuberculosis*, the BCG SCs showed increased  
13 growth at sub-MIC concentrations of several antibiotics, in this case INH, EMB and RIF (Fig.  
14 S3C-E). LC revertants with reconstituted *glpK* open reading frames occurred in the absence of  
15 antibiotic selection, and these LCs were now fully susceptible to all antibiotics tested including  
16 POA (Fig. S3F).

17

18 **Supplementary Figures**

19

20

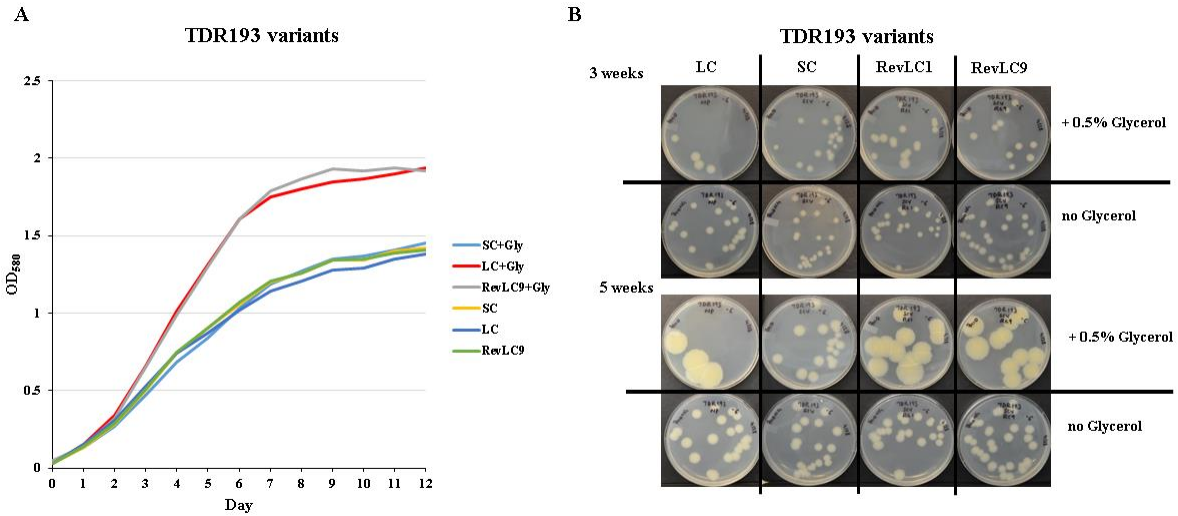

21

22 **Fig. S1. Growth kinetics of *M. tuberculosis* small and large colonies in the presence of**  
23 **glycerol. (A)** TDR193 variants were grown in 7H9 + OADC (Oleic acid-Albumin-NaCl-  
24 Dextrose-Catalase) containing or not-containing glycerol. Growth of each strain was followed by  
25 measuring optical density at 580nm (OD<sub>580</sub>). A representative graph of three independent  
26 experiments is shown. **(B)** The cultures were plated on 7H10 + OADC media containing or not-  
27 containing glycerol and incubated at 37°C for 5 weeks. Colony sizes were visualized at 3 and 5  
28 weeks. A representative growth on 7H10 agar medium of three independent experiments is  
29 shown. LC: TDR193-LC (large colony); SC: TDR193-SC (small colony); RevLC1: TDR193-  
30 SC-RevLC1 (revertant large-colony #1); RevLC9: TDR193-SC-RevLC9 (revertant large-colony  
31 #9); + Gly: with 1% glycerol.

32

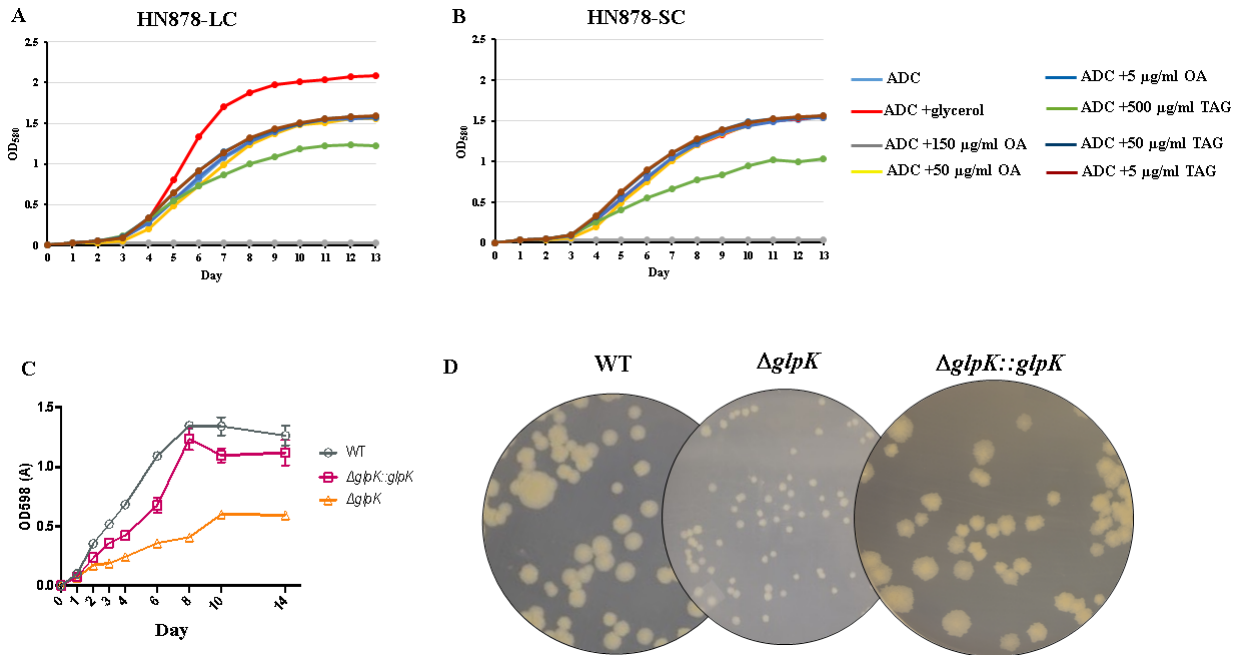

33

34

35 **Fig. S2. Growth kinetics of *M. tuberculosis* small and large colonies in the presence of**  
 36 **various carbon sources and antibiotics. (A) HN878-LC and (B) HN878-SC were grown in**  
 37 **7H9 + ADC (Albumin-NaCl-Dextrose-Catalase) medium supplemented with various carbon**  
 38 **sources, glycerol (trihydroxy sugar alcohol), OA (oleic acid, free fatty acid), or TAG (glyceryl**  
 39 **trioleate, triglyceride derived from glycerol and three units of oleic acid). (C) Slow growth of**  
 40 **H37Rv $\Delta glpK$  compared to wild type (WT) and complement strain ( $\Delta glpK::glpK$ ) in 7H9**  
 41 **supplemented with oleic acid-Albumin-NaCl-Dextrose-Catalase and 0.5% glycerol. (D) The**  
 42 **H37Rv $\Delta glpK$  mutant showed a small colony phenotype on 7H10 medium supplemented with**  
 43 **0.5% glycerol compared to WT and complement  $\Delta glpK::glpK$ .**

44

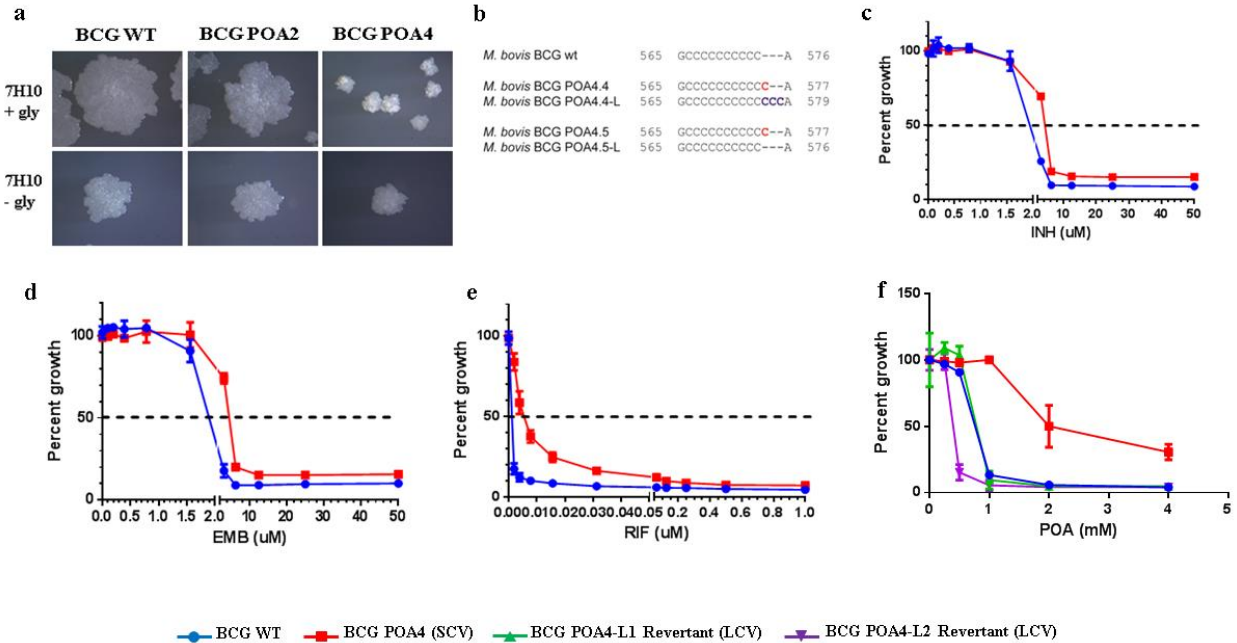

46

**Fig. S3. *M. bovis* BCG small colony variants and drug susceptibility.** (A) Colony morphology of POA-resistant *panD* mutant BCG POA2 and POA-resistant *glpK* mutant BCG POA4 in comparison with BCG wild-type (WT) on 7H10 agar with 0.5% glycerol and without glycerol (gly). Bacteria were grown at 37°C for 4 weeks. Isolation and characterization of *panD* mutant BCG POA2 and *glpK* mutant BCG POA4 has been described previously(1): BCG POA2 harbors a missense mutation Leu132Arg (T395G) in *panD* and BCG POA4 harbors +1 frameshift mutations in *glpK* (Ins567C) and *mas* (Ins4999G) respectively. (B) *glpK* slippage site sequences of WT *M. bovis* BCG and various mutant strains. BCG POA4.4 and POA 4.5 harbor +1 frameshifted *glpK* with 1 C (indicated in red) inserted while their LC variants BCG POA4.4-L harbor doublet C insertions (indicated in blue) and BCG POA4.5-L display a 1 C deletion in *glpK* as compared to their respective parent strains. In addition, POA4.4-L and POA4.5-L harbor *panD* missense mutations ( $\Delta$ 417/418A/T and A62G/His21Arg, respectively), conferring POA resistance. Differential susceptibility of BCG variants to (C) INH, (D) EMB, (E) RIF, and (F) POA was determined by percent growth using OD<sub>600</sub> measurement, compared to no treated control.

62

63 **Supplementary Tables**64 **Table S1. Resistance profile and the *glpK* 7C homopolymeric tract genotypes of clinical *M.***  
65 ***tuberculosis* isolates.**

| TDR strain (s)                                                                                                                                     | Genotype of 7C homopolymeric tract | Resistance    |
|----------------------------------------------------------------------------------------------------------------------------------------------------|------------------------------------|---------------|
| 5; 17; 22; 41; 63; 64; 77; 95; 146; 163; 180; 182; 213                                                                                             | WT                                 | ---           |
| 1; 34                                                                                                                                              | WT                                 | RIF           |
| 52; 83                                                                                                                                             | WT                                 | INH           |
| 94; 126; 128                                                                                                                                       | WT                                 | EMB           |
| 10; 28; 51; 76; 119; 129                                                                                                                           | WT                                 | RIF; INH      |
| 218                                                                                                                                                | WT                                 | RIF; EMB      |
| 42; 93; 104; 105; 120; 121; 123; 144                                                                                                               | WT                                 | INH; EMB      |
| 7; 11; 13; 19; 21; 50; 56; 58; 59; 67; 69; 70; 72; 73; 74; 87; 101; 106; 111; 114; 115; 117; 122; 124; 133; 135; 150; 151; 154; 155; 162; 168; 176 | WT                                 | RIF; INH; EMB |
| 80                                                                                                                                                 | InsC                               | ---           |
| 148                                                                                                                                                | InsC                               | RIF; INH      |
| 6; 31; 89; 100; 116; 152; 175; 216                                                                                                                 | InsC                               | RIF; INH; EMB |
| 29; 33; 81                                                                                                                                         | WT and InsC                        | ---           |
| 12; 18                                                                                                                                             | WT and InsC                        | RIF           |
| 143                                                                                                                                                | WT and InsC                        | EMB           |
| 86; 189                                                                                                                                            | WT and InsC                        | RIF; INH      |
| 85; 132                                                                                                                                            | WT and InsC                        | INH; EMB      |
| 32; 65; 71; 99; 113; 196                                                                                                                           | WT and InsC                        | RIF; INH; EMB |

66 WT, wild-type; InsC, insertion of C; RIF, rifampicin, INH, isoniazid; EMB, ethambutol

67

68 **Table S2. Mutations in homopolymeric tracts were identified in whole-genome shotgun**  
69 **contigs of clinical *M. tuberculosis* isolates and complete genome sequences of reference**  
70 **strains.**

| Gene or intergenic  | Gene coordinates               | Homopolymeric tract coordinates (#N) | Number of mutants identified in NCBI database | Mutations in reference strains                                                                                      |
|---------------------|--------------------------------|--------------------------------------|-----------------------------------------------|---------------------------------------------------------------------------------------------------------------------|
| Rv0759c-<br>Rv0760c | 853825-854157<br>854267-854686 | 854253-854261 (9C)                   | >5                                            | CDC1551;<br>CCDC5079;<br>CCDC5180; F11;<br>KZN1435; KZN4207;<br>KZN605 ( $\Delta$ C); K<br>( $\Delta$ CC)           |
| PPE13               | 976872-978203                  | 976898-976906 (9G)                   | >5                                            | F11; KZN1435;<br>KZN4207; KZN605<br>(InsC); K ( $\Delta$ C)                                                         |
| pknA                | 17467-18762                    | 17897-17904 (8G)                     | 0                                             | None                                                                                                                |
| PPE13               | 976872-978203                  | 976890-976897 (8T)                   | >5                                            | None                                                                                                                |
| wag22               | 1989833-1992577                | 1992324-1992331 (8C)                 | >5                                            | CDC1551 ( $\Delta$ C)                                                                                               |
| Rv2081c             | 2338065-2338505                | 2338195-2338202 (8C)                 | >5                                            | F11; CCDC5180<br>(InsC); K ( $\Delta$ C);<br>KZN605; KZN4207<br>(Ins12C); KZN1435<br>(InsCs and other<br>mutations) |
| lppZ                | 3364709-3365830                | 3364856-3364863 (8C)                 | 1                                             | None                                                                                                                |
| dnaA-dnaN           | 1-1524<br>2052-3260            | 1553-1559 (7A)                       | 2                                             | None                                                                                                                |
| bioF2               | 34295-36610                    | 36471-36477 (7C)                     | >5                                            | KZN1435; KZN4207;<br>KZN605 (InsC)                                                                                  |
| Rv0064              | 68620-71559                    | 71454-71460 (7C)                     | 0                                             | None                                                                                                                |
| ctpA                | 100583-102868                  | 101500-101506 (7G)                   | 3                                             | None                                                                                                                |
| Rv0161              | 100583-102868                  | 101500-101506 (7G)                   | >5                                            | CDC1551 (InsC) (the<br>insertion is confirmed<br>by Sanger sequencing)                                              |
| mmpL11              | 238392-241292                  | 238808-238814 (7C)                   | 0                                             | None                                                                                                                |
| htdX                | 289812-290654                  | 290164-290170 (7T)                   | 0                                             | None                                                                                                                |

|                |                                    |                                          |               |                              |
|----------------|------------------------------------|------------------------------------------|---------------|------------------------------|
| vapC2-Rv0302   | 364044-364469<br>364605-365237     | 364499-364505 (7G)                       | >5            | None                         |
| PPE6           | 372820-375711                      | 373027-373033 (7A)                       | Indel mutants | None                         |
| lpqK           | 477327-478556                      | 478228-478234 (7T)                       | 1             | None                         |
| Rv0497         | 587377-588309                      | 587729-587735 (7C)                       | 0             | None                         |
| PE_PGRS6       | 622793-624577                      | 623675-623681 (7G)                       | 5             | None                         |
| menC           | 644490-645470                      | 644505-644511 (7C)                       | 1             | None                         |
| mce2D          | 690501-692027                      | 691888-691894 (7C)                       | >5            | None                         |
| lldD1-Rv0695   | 793335-794525<br>794715-795470     | 794673-794679 (7A)                       | 4             | None                         |
| Rv0698         | 798833-799444                      | 799137-799143 (7C)                       | >5            | None                         |
| PE_PGRS10      | 838451-840856                      | 839546-839552 (7G)                       | 0             | None                         |
| Rv0774c        | 867440-868351                      | 868161-868167 (7G)                       | 3             | None                         |
| Rv0805         | 898831-899787                      | 898906-898912 (7G)                       | 3             | None                         |
| mshD-phoT      | 911736-912683<br>912726-913502     | 912695-912701 (7C)                       | 2             | None                         |
| Rv0822c        | 914257-916311                      | 914502-914508 (7A)                       | 2             | None                         |
| PE_PGRS13      | 925361-927610                      | 926306-926312 (7G)<br>927020-927026 (7G) | 4<br>0        | None                         |
| PE_PGRS14      | 927837-930485                      | 928286-928292 (7C)<br>929018-929024 (7C) | >5<br>5       | None                         |
| PE_PGRS15      | 968424-970244                      | 969734-969740 (7C)                       | >5            | None                         |
| Rv0897c        | 1000808-1002415                    | 1002283-1002289 (7C)                     | >5            | None                         |
| Rv0920c-Rv0921 | 1025497-1026816<br>1027104-1027685 | 1026917-1026923 (7G)                     | >5            | None                         |
| Rv0954         | 1065127-1066038                    | 1066021-1066027 (7G)                     | 3             | None                         |
| PE_PGRS16      | 1090373-1093144                    | 1091981-1091987 (7G)                     | >5            | CCDC5180 ( $\Delta$ GG)      |
| Rv0987         | 1102542-1105109                    | 1104574-1104580 (7T)                     | 3             | None                         |
| Rv1048c        | 1171038-1172153                    | 1171552-1171558 (7T)                     | 2             | None                         |
| pra            | 1203313-1204035                    | 1203484-1203490 (7G)                     | 0             | None                         |
| Rv1190         | 1332980-1333858                    | 1333662-1333668 (7G)                     | >5            | CCDC5180;<br>CCDC5079 (InsG) |

|             |                                    |                                              |         |                                                                                  |
|-------------|------------------------------------|----------------------------------------------|---------|----------------------------------------------------------------------------------|
| PE_PGRS23   | 1384989-1386677                    | 1386011-1386017 (7C)                         | 4       | None                                                                             |
| Rv1303      | 1459766-1460251                    | 1459830-1459836 (7T)                         | 0       | None                                                                             |
| PE_PGRS24   | 1488154-1489965                    | 1488558-1488564 (7C)                         | 1       | None                                                                             |
| Rv1373      | 1546012-1546992                    | 1546466-1546472 (7C)                         | >5      | None                                                                             |
| PE_PGRS25   | 1572127-1573857                    | 1572681-1572687 (7C)<br>1573161-1573167 (7C) | >5<br>1 | KZN605; KZN1435;<br>KZN4207 ( $\Delta$ G)<br>None                                |
| PE_PGRS26   | 1618209-1619784                    | 1619016-1619022 (7G)                         | >5      | None                                                                             |
| PE_PGRS27   | 1630638-1634627                    | 1632350-1632356 (7C)                         | >5      | None                                                                             |
| PE_PGRS29   | 1655609-1656721                    | 1655830-1655836 (7C)                         | >5      | None                                                                             |
| mutB        | 1684005-1686257                    | 1685260-1685266 (7G)                         | 4       | None                                                                             |
| Rv1509      | 1700212-1701093                    | 1700416-1700422 (7G)                         | >5      | None                                                                             |
| Rv1526c     | 1720780-1722060                    | 1721428-1721435 (7A)                         | 0       | None                                                                             |
| pks5-papA4  | 1722083-1728409<br>1728953-1729450 | 1728581-1728588 (7A)                         | 3       | CCDC5079 ( $\Delta$ A)                                                           |
| lspA        | 1742244-1742852                    | 1742298-1742304 (7G)                         | 0       | None                                                                             |
| frdB        | 1759435-1760178                    | 1760165-1760171 (7G)                         | >5      | None                                                                             |
| Rv1590      | 1791334-1791573                    | 1791451-1791457 (7C)                         | 1       | None                                                                             |
| Rv1634      | 1839168-1840583                    | 1839756-1839762 (7G)                         | 0       | CCDC5180;<br>CCDC5079; K (the<br>fourth G of the<br>sequence is mutated to<br>C) |
| lysX-infC   | 1848517-1852035<br>1852273-1852878 | 1852177-1852183 (7T)                         | 0       | K ( $\Delta$ T)                                                                  |
| infC        | 1852273-1852878                    | 1852336-1852342 (7G)                         | 0       | None                                                                             |
| Rv1648-pheS | 1857731-1858537<br>1858733-1859758 | 1858709-1858715 (7C)                         | 0       | None                                                                             |
| pheT        | 1859758-1862253                    | 1860940-1860946 (7G)                         | 0       | None                                                                             |
| PE_PGRS30   | 1862347-1865382                    | 1864038-1864044 (7C)<br>1864138-1864144 (7C) | 0<br>2  | None                                                                             |
| argD        | 1868723-1869925                    | 1868796-1868802 (7C)                         | 0       | None                                                                             |
| wag22       | 1989833-1992577                    | 1990552-1990558 (7C)                         | >5      | None                                                                             |
| PE_PGRS31   | 2000614-2002470                    | 2001790-2001796 (7G)                         | >5      | None                                                                             |



|                |                                    |                                              |        |                                                                                     |
|----------------|------------------------------------|----------------------------------------------|--------|-------------------------------------------------------------------------------------|
| Rv1778c        | 2012081-2012530                    | 2012424-2012430 (7G)                         | 2      | None                                                                                |
| PPE28          | 2039453-2041420                    | 2041242-2041248 (7T)                         | 2      | None                                                                                |
| gcvB           | 2075877-2078702                    | 2076160-2076166 (7C)                         | 1      | None                                                                                |
| apa            | 2107736-2108713                    | 2107941-2107947 (7C)                         | 4      | None                                                                                |
| Rv1894c        | 2140739-2141869                    | 2141409-2141415 (7G)                         | >5     | None                                                                                |
| Rv1990A-mazF6  | 2233881-2234216<br>2234305-2234649 | 2234248-2234254 (7G)                         | >5     | None                                                                                |
| ppm1           | 2308131-2310755                    | 2308554-2308560 (7C)                         | 0      | None                                                                                |
| Rv2082         | 2338709-2340874                    | 2339949-2339955 (7C)                         | >5     | CCDC5180 (InsC)                                                                     |
| ansP1          | 2388616-2390085                    | 2389157-2389163 (7T)                         | 0      | None                                                                                |
| ftsZ           | 2408385-2409524                    | 2409194-2409200 (7C)<br>2409514-2409520 (7G) | 0<br>0 | None                                                                                |
| Rv2177c-aroG   | 2439282-2439947<br>2440332-2441720 | 2440188-2440194 (7G)                         | >5     | KZN605; KZN1435;<br>KZN4207 ( $\Delta$ G)                                           |
| Rv2186c        | 2447605-2447994                    | 2447670-2447676 (7T)                         | 0      | None                                                                                |
| Rv2204c        | 2468931-2469287                    | 2469149-2469156 (7C)                         | 0      | None                                                                                |
| Rv2209         | 2473400-2474938                    | 2473737-2473743 (7T)                         | 5      | None                                                                                |
| Rv2240c        | 2511690-2512280                    | 2512238-2512244 (7C)                         | 4      | None                                                                                |
| fabD           | 2516787-2517695                    | 2517590-2517596 (7C)                         | 0      | None                                                                                |
| Rv2248         | 2522360-2523175                    | 2522482-2522488 (7G)                         | >5     | None                                                                                |
| Rv2264c        | 2536572-2538350                    | 2536626-2536632 (7G)                         | >5     | K (InsG);<br><br>CCDC5079;<br>CCDC5180 (InsA<br>between the third and<br>fourth Gs) |
| Rv2293c-Rv2294 | 2564292-2565032<br>2565327-2566550 | 2565159-2565166 (7T)                         | 3      | None                                                                                |
| htpG           | 2570059-2572002                    | 2571312-2571318 (7C)                         | 2      | None                                                                                |
| PPE40          | 2637688-2639535                    | 2639268-2639274 (7C)                         | 5      | None                                                                                |
| hemN           | 2682015-2683142                    | 2682917-2682923 (7C)                         | >5     | None                                                                                |
| PE_PGRS41      | 2692799-2693884                    | 2693195-2693201 (7G)                         | 5      | None                                                                                |
| gdh            | 2777388-2782262                    | 2779013-2779019 (7C)                         | 0      | None                                                                                |
| PE_PGRS42      | 2795301-2797385                    | 2796132-2796138 (7C)                         | >5     | F11 (InsG)                                                                          |

|                       |                                    |                                              |               |                                                 |
|-----------------------|------------------------------------|----------------------------------------------|---------------|-------------------------------------------------|
| PE_PGRS43             | 2801254-2806236                    | 2804943-2804949 (7C)                         | >5            | None                                            |
| nusB                  | 2858254-2858724                    | 2858259-2858265 (7C)                         | 0             | None                                            |
| lppB                  | 2867124-2867786                    | 2867738-2867744 (7C)                         | >5            | None                                            |
| Rv2561                | 2881409-2881702                    | 2881583-2881589 (7T)                         | Indel mutants | None                                            |
| PE_PGRS46             | 2960105-2962441                    | 2960945-2960951 (7C)                         | >5            | CCDC5079 (InsC)                                 |
| Rv2652c-<br>Rv2653c   | 2975928-2976554<br>2976586-2976909 | 2976559-2976565 (7C)                         | >5            | None                                            |
| dxs1                  | 2998052-2999968                    | 2999852-2999858 (7C)                         | 0             | None                                            |
| dxs1-Rv2683           | 2998052-2999968<br>3000112-3000609 | 2999989-2999995 (7C)                         | 4             | None                                            |
| Rv2762c               | 3072637-3073056                    | 3072706-3072712 (7C)                         | >5            | None                                            |
| rpsO                  | 3093479-3093748                    | 3093723-3093729 (7T)                         | 2             | None                                            |
| Rv2803                | 3111822-3112289                    | 3112278-3112284 (7C)                         | >5            | None                                            |
| PE_PGRS48             | 3162268-3164115                    | 3163651-3163657 (7G)                         | >5            | K (the fifth G of the sequence is mutated to C) |
| ppsA                  | 3245445-3251075                    | 3248309-3248315 (7C)                         | 0             | KZN1435 (InsC)                                  |
| ppsC                  | 3255685-3262251                    | 3258352-3258358 (7C)<br>3258369-3258375 (7C) | 0<br>2        | None                                            |
| Rv2955c               | 3307580-3308545                    | 3308314-3308320 (7G)                         | >5            | None                                            |
| PPE46                 | 3376939-3378243                    | 3377347-3377353 (7C)                         | 5             | None                                            |
| PPE47                 | 3379376-3380452                    | 3379784-3379790 (7C)                         | 0             | None                                            |
| lipR                  | 3449997-3450923                    | 3450183-3450189 (7C)                         | >5            | None                                            |
| Rv3143                | 3509654-3510055                    | 3509817-3509823 (7G)                         | 1             | None                                            |
| aofH                  | 3538505-3539851                    | 3539140-3539146 (7G)                         | >5            | None                                            |
| Rv3192                | 3559563-3560024                    | 3559991-3559997 (7C)                         | >5            | None                                            |
| Rv3205c               | 3581627-3582505                    | 3582012-3582018 (7G)                         | 1             | None                                            |
| Rv3225c               | 3601016-3602440                    | 3602344-3602350 (7C)                         | >5            | None                                            |
| Rv3256c               | 3636275-3637315                    | 3636334-3636340 (7C)                         | 2             | None                                            |
| PE_PGRS50             | 3738158-3742774                    | 3741964-3741970 (7C)                         | 0             | None                                            |
| PE_PGRS50-<br>Rv3346c | 3738158-3742774<br>3743198-3743455 | 3742992-3742998 (7G)                         | >5            | None                                            |

|             |                                    |                      |    |                                                                                  |
|-------------|------------------------------------|----------------------|----|----------------------------------------------------------------------------------|
| guaB2       | 3829930-3831519                    | 3830214-3830220 (7C) | 0  | None                                                                             |
| Rv3413c     | 3832146-3833045                    | 3832357-3832363 (7G) | >5 | None                                                                             |
| rpsK        | 3879273-3879692                    | 3879675-3879681 (7T) | 1  | None                                                                             |
| PE_PGRS53   | 3926569-3930714                    | 3927679-3927685 (7G) | 0  | None                                                                             |
| fadE33      | 4005247-4006203                    | 4005251-4005257 (7C) | 0  | None                                                                             |
| aspB        | 4006200-4007366                    | 4007272-4007278 (7G) | 3  | None                                                                             |
| Rv3577      | 4019262-4020128                    | 4019547-4019553 (7G) | >5 | None                                                                             |
| lpqE-radA   | 4025830-4026378<br>4026444-4027886 | 4026423-4026429 (7C) | >5 | None                                                                             |
| Rv3603c     | 4045207-4046118                    | 4045485-4045491 (7C) | 2  | None                                                                             |
| espA-ephA   | 4055197-4056375<br>4057733-4058701 | 4056481-4056487 (7T) | 1  | None                                                                             |
| PE_PGRS61   | 4093940-4094527                    | 4094054-4094060 (7G) | 1  | None                                                                             |
| B11         | 4099386-4099478                    | 4099403-4099409 (7G) | >5 | None                                                                             |
| ponA2       | 4121916-4124348                    | 4123559-4123565 (7C) | 1  | None                                                                             |
| glpK        | 4138202-4139755                    | 4139184-4139190 (7C) | >5 | None                                                                             |
| fadE35      | 4251085-4252866                    | 4251294-4251300 (7G) | 5  | CCDC5079;<br>CCDC5180; K (the<br>fourth G of the<br>sequence is mutated to<br>C) |
| pks13       | 4255945-4261146                    | 4258501-4258507 (7G) | 0  | None                                                                             |
| pks2        | 4293225-4299605                    | 4298221-4298227 (7G) | >5 | None                                                                             |
| Rv3835      | 4309047-4310396                    | 4310176-4310182 (7C) | >5 | None                                                                             |
| Rv3848-espR | 4322326-4323234<br>4323499-4323897 | 4323355-4323361 (7G) | >5 | CDC1551 (the first G<br>of the sequence is<br>mutated to C)                      |
| hns         | 4325074-4325478                    | 4325206-4325212 (7A) | 5  | None                                                                             |
| Rv3860      | 4336777-4337949                    | 4337821-4337827 (7G) | >5 | None                                                                             |
| eccD1       | 4355007-4356542                    | 4355864-4355870 (7G) | 1  | None                                                                             |
| espK        | 4357593-4359782                    | 4358980-4358986 (7G) | >5 | None                                                                             |
| Rv3910      | 4396597-4400151                    | 4398671-4398677 (7C) | 0  | None                                                                             |

71 CDC1551 (GenBank ID: AE000516.2), CCDC5079 (GenBank ID: CP002884.1), CCDC5180  
72 (GenBank ID: CP001642.1), F11 (GenBank ID: CP000717.1), KZN605 (GenBank ID:

73 CP001976.1), KZN1435 (GenBank ID: CP001658.1), KZN4207 (GenBank ID: CP001662.1)  
74 and K (GenBank ID: CP007803.1).  
75

76 **Table S3. BioSample accession numbers for genomes and transcriptomes analyzed in this**  
77 **study.**

| Accession    | Strain          | Method | Biological replicate | Medium            |
|--------------|-----------------|--------|----------------------|-------------------|
| SAMN09517834 | TDR193-LC       | WGS    | 1                    | N/A               |
| SAMN09517835 | TDR193-SC       | WGS    | 1                    | N/A               |
| SAMN09517836 | TDR193-SC-RevC1 | WGS    | 1                    | N/A               |
| SAMN09517837 | TDR193-SC-RevC9 | WGS    | 1                    | N/A               |
| SAMN09517838 | C71-LC          | WGS    | 1                    | N/A               |
| SAMN09517839 | C71-SC          | WGS    | 1                    | N/A               |
| SAMN09517840 | C71-SC-RevC1    | WGS    | 1                    | N/A               |
| SAMN09517841 | HN878-XM4-LC1   | WGS    | 1                    | N/A               |
| SAMN09517842 | HN878-XM4-LC2   | WGS    | 1                    | N/A               |
| SAMN09517843 | HN878-XM4-LC3   | WGS    | 1                    | N/A               |
| SAMN09517844 | HN878-XM4-SC4   | WGS    | 1                    | N/A               |
| SAMN09517845 | HN878-XM4-SC5   | WGS    | 1                    | N/A               |
| SAMN09517846 | HN878-XM4-SC6   | WGS    | 1                    | N/A               |
| SAMN10742622 | HN878-SC        | WGS    | 1                    | N/A               |
| SAMN09517865 | TDR193-SC-RevC9 | RNAseq | 1                    | 7H9               |
| SAMN09517866 | TDR193-SC-RevC9 | RNAseq | 2                    | 7H9               |
| SAMN09517867 | TDR193-SC-RevC9 | RNAseq | 3                    | 7H9               |
| SAMN09517868 | TDR193-SC       | RNAseq | 1                    | 7H9               |
| SAMN09517869 | TDR193-SC       | RNAseq | 2                    | 7H9               |
| SAMN09517870 | TDR193-SC       | RNAseq | 3                    | 7H9               |
| SAMN09517871 | TDR193-SC-RevC9 | RNAseq | 1                    | 7H9 with glycerol |
| SAMN09517872 | TDR193-SC-RevC9 | RNAseq | 2                    | 7H9 with glycerol |
| SAMN09517873 | TDR193-SC-RevC9 | RNAseq | 3                    | 7H9 with glycerol |
| SAMN09517874 | TDR193-SC       | RNAseq | 1                    | 7H9 with glycerol |

|              |           |        |   |                   |
|--------------|-----------|--------|---|-------------------|
| SAMN09517875 | TDR193-SC | RNAseq | 2 | 7H9 with glycerol |
| SAMN09517876 | TDR193-SC | RNAseq | 3 | 7H9 with glycerol |
| SAMN10742623 | HN878-SC  | RNAseq | 1 | 7H9               |
| SAMN10742624 | HN878-SC  | RNAseq | 2 | 7H9               |
| SAMN10742625 | HN878-SC  | RNAseq | 3 | 7H9               |
| SAMN10742626 | HN878-SC  | RNAseq | 1 | 7H9 with glycerol |
| SAMN10742627 | HN878-SC  | RNAseq | 2 | 7H9 with glycerol |
| SAMN10742628 | HN878-SC  | RNAseq | 3 | 7H9 with glycerol |
| SAMN10742629 | HN878-LC  | RNAseq | 1 | 7H9               |
| SAMN10742630 | HN878-LC  | RNAseq | 2 | 7H9               |
| SAMN10742631 | HN878-LC  | RNAseq | 3 | 7H9               |
| SAMN10742632 | HN878-LC  | RNAseq | 1 | 7H9 with glycerol |
| SAMN10742633 | HN878-LC  | RNAseq | 2 | 7H9 with glycerol |
| SAMN10742634 | HN878-LC  | RNAseq | 3 | 7H9 with glycerol |

78

79

80 **RNaseq Supplementary Information (RNaseq SI)**

81

82 **GSEA Enrichment: Regulons**

83

| REGULATOR         | TARGET    |     | SET   | SIZE  | ES    | NES  | Regulon  |       | Fisher's |       | LeadingEdge |      |        | Analysis |          |
|-------------------|-----------|-----|-------|-------|-------|------|----------|-------|----------|-------|-------------|------|--------|----------|----------|
|                   | GENE      | ES  |       |       |       |      | Activity | NOM   | Combined | RANK  | Tags        | List | Signal |          | Weighted |
|                   |           |     |       |       |       |      | Change   | Score | p-val    | p-val | AT          | MAX  |        |          | Signal   |
| Rv3133c<br>(dosR) | Repressed | 40  | 0.33  | 0.82  | -1.07 | 0.73 | 0.73     | 0.55  | 330      | 20%   | 8%          | 22%  | 58%    |          |          |
|                   | Activated | 82  | -0.57 | -1.19 | 0.30  | 0.30 | 0.55     | 840   | 61%      | 21%   | 76%         |      |        |          |          |
| Rv3574<br>(kstR)  | Repressed | 60  | -0.54 | -1.51 | 1.49  | 0.05 | 0.05     | 0.01  | 980      | 57%   | 25%         | 74%  | 66%    |          |          |
|                   | Activated | 13  | 0.60  | 1.38  | 0.03  | 0.03 | 0.01     | 57    | 31%      | 1%    | 31%         |      |        |          |          |
| Rv1395            | Repressed | 20  | -0.49 | -1.04 | 1.08  | 0.48 | 0.48     | 0.38  | 1087     | 50%   | 27%         | 69%  | 60%    |          |          |
|                   | Activated | 12  | 0.50  | 1.14  | 0.26  | 0.26 | 0.38     | 222   | 42%      | 6%    | 44%         |      |        |          |          |
| Rv1219c           | Repressed | 39  | -0.34 | -1.13 | 1.34  | 0.24 | 0.24     | 0.00  | 418      | 18%   | 11%         | 20%  | 43%    |          |          |
|                   | Activated | 41  | 0.72  | 1.54  | 0.00  | 0.00 | 0.00     | 387   | 59%      | 10%   | 64%         |      |        |          |          |
| Rv1994c<br>(cmtR) | Repressed | 29  | -0.39 | -1.06 | 1.17  | 0.40 | 0.40     | 0.12  | 527      | 28%   | 13%         | 32%  | 42%    |          |          |
|                   | Activated | 15  | 0.68  | 1.39  | 0.06  | 0.06 | 0.12     | 516   | 53%      | 13%   | 61%         |      |        |          |          |
| Rv1990c           | Repressed | 64  | -0.33 | -0.97 | 1.09  | 0.53 | 0.53     | 0.07  | 507      | 19%   | 13%         | 21%  | 32%    |          |          |
|                   | Activated | 25  | 0.74  | 1.40  | 0.03  | 0.03 | 0.07     | 273   | 56%      | 7%    | 60%         |      |        |          |          |
| Rv2250c           | Repressed | 59  | 0.53  | 1.47  | -1.46 | 0.02 | 0.02     | 0.00  | 749      | 42%   | 19%         | 51%  | 53%    |          |          |
|                   | Activated | 37  | -0.58 | -1.43 | 0.03  | 0.03 | 0.00     | 764   | 46%      | 19%   | 56%         |      |        |          |          |
| Rv3058c           | Repressed | 121 | 0.47  | 1.23  | -1.28 | 0.22 | 0.22     | 0.12  | 723      | 40%   | 18%         | 48%  | 51%    |          |          |
|                   | Activated | 131 | -0.57 | -1.32 | 0.11  | 0.11 | 0.12     | 576   | 47%      | 15%   | 54%         |      |        |          |          |
| Rv0324            | Repressed | 125 | 0.31  | 1.06  | -1.25 | 0.33 | 0.33     | 0.06  | 523      | 20%   | 13%         | 22%  | 37%    |          |          |
|                   | Activated | 120 | -0.59 | -1.44 | 0.04  | 0.04 | 0.06     | 551   | 47%      | 14%   | 53%         |      |        |          |          |
| Rv3765c<br>(tcrX) | Repressed | 36  | 0.46  | 0.90  | -1.02 | 0.64 | 0.64     | 0.52  | 611      | 39%   | 15%         | 46%  | 51%    |          |          |
|                   | Activated | 55  | -0.42 | -1.11 | 0.30  | 0.30 | 0.52     | 782   | 44%      | 20%   | 54%         |      |        |          |          |
| Rv0576            | Repressed | 242 | -0.42 | -1.33 | 1.33  | 0.05 | 0.05     | 0.02  | 855      | 40%   | 22%         | 49%  | 49%    |          |          |
|                   | Activated | 23  | 0.56  | 1.39  | 0.06  | 0.06 | 0.02     | 691   | 39%      | 17%   | 47%         |      |        |          |          |
| Rv2034            | Repressed | 37  | -0.51 | -1.40 | 1.38  | 0.07 | 0.07     | 0.03  | 908      | 35%   | 23%         | 45%  | 45%    |          |          |
|                   | Activated | 26  | 0.58  | 1.35  | 0.08  | 0.08 | 0.03     | 376   | 42%      | 10%   | 46%         |      |        |          |          |
| Rv3223c<br>(sigH) | Repressed | 254 | 0.48  | 1.47  | -1.42 | 0.02 | 0.02     | 0.01  | 594      | 31%   | 15%         | 34%  | 36%    |          |          |
|                   | Activated | 88  | -0.44 | -1.28 | 0.08  | 0.08 | 0.01     | 608   | 36%      | 15%   | 42%         |      |        |          |          |
| Rv0047c           | Repressed | 33  | 0.35  | 1.14  | -1.28 | 0.25 | 0.25     | 0.06  | 451      | 18%   | 11%         | 20%  | 30%    |          |          |
|                   | Activated | 30  | -0.61 | -1.44 | 0.04  | 0.04 | 0.06     | 387   | 37%      | 10%   | 40%         |      |        |          |          |

84

85

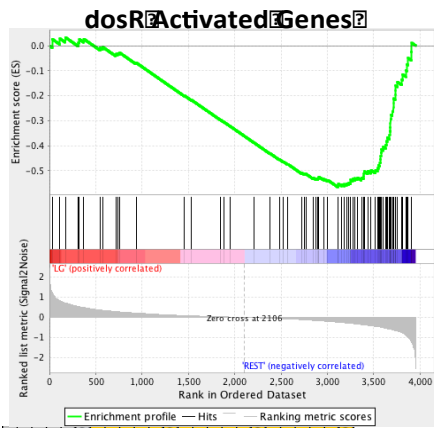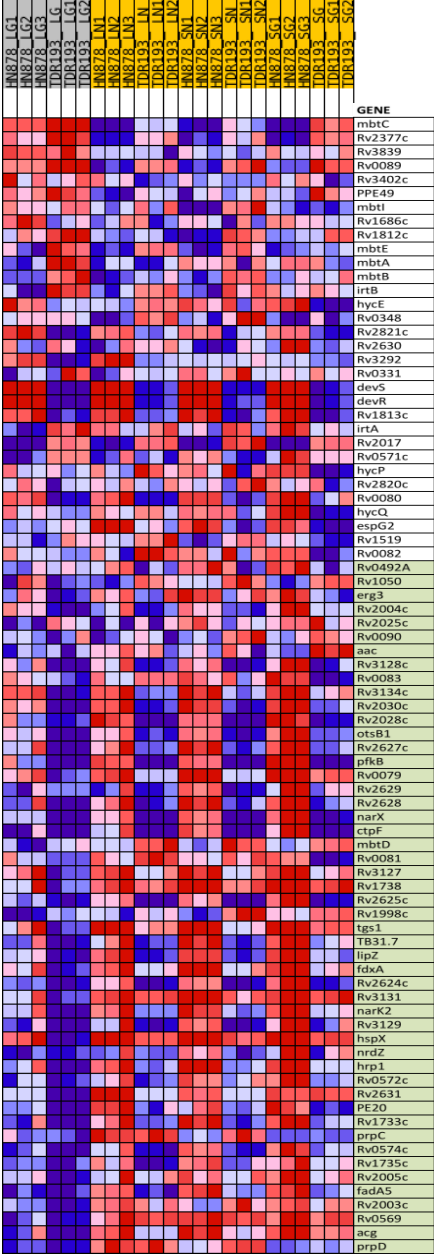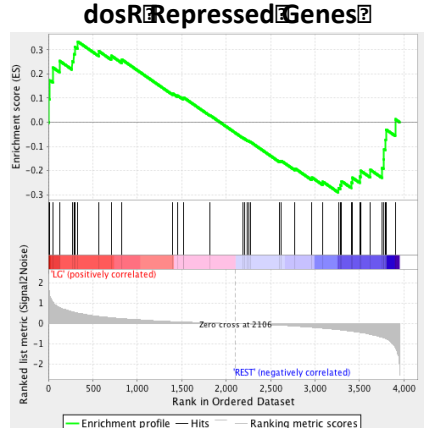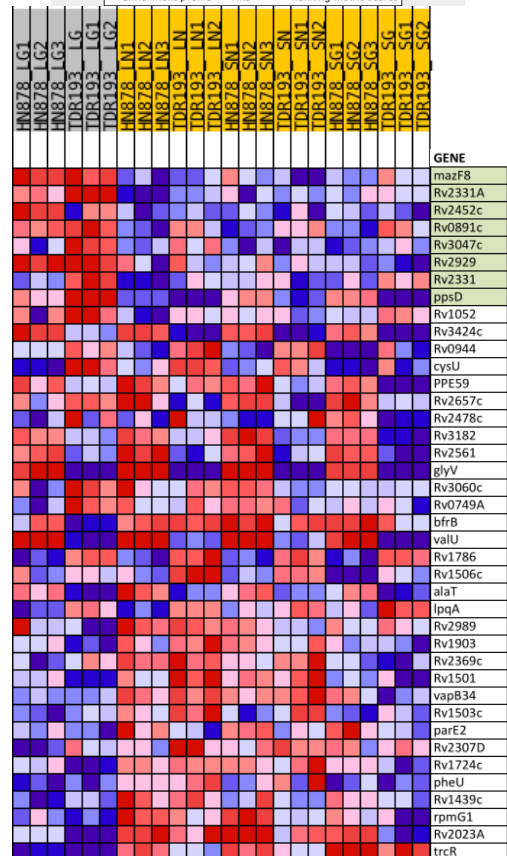







89

- 90 1. Gopal P, *et al.* (2016) Pyrazinamide Resistance Is Caused by Two Distinct Mechanisms:  
91 Prevention of Coenzyme A Depletion and Loss of Virulence Factor Synthesis. *ACS Infectious*  
92 *Diseases* 2(9):616-626.

93
